# Supplementary material
Source: PubMed Central journal article supplement (PMC6609482)
Supplement: NIHMS1528932-supplement-2.pdf [file NIHMS1528932-supplement-2.pdf]

**Supplementary Table 1. Mass Spectral characterization of HMCES SRAP domain interaction with abasic site containing DNA**

| Sample          | Theoretical Mass (Da)* | Measured Mass (Da) | comments                                      |
|-----------------|------------------------|--------------------|-----------------------------------------------|
| SRAPd alone     | 31632.6                | 31633.1            | N-terminal Met and C-terminal His-tag cleaved |
| SRAPd + AP9 DNA | 35143.3                | 35143.6            | SRAPd-DNA thiazolidine crosslink              |

\*Theoretical Masses were calculated using ExPASy ProtParam.

**Supplementary Table 2. DNA sequences used in FP DNA-binding assays**

|              | DNA sequences                                                                              |                            |
|--------------|--------------------------------------------------------------------------------------------|----------------------------|
| ssDNA_12     | 6FAM-5'-CTGACGCGTATC-3'                                                                    | 6FAM: 6-carboxyfluorescein |
| ssDNA_32     | 6FAM-5'-TCTTCTGGTCCGGATGGTAGTTAAGTGTTGAG-3'                                                | 6FAM: 6-carboxyfluorescein |
| dsDNA_32     | 6FAM-5'-TCTTCTGGTCCGGATGGTAGTTAAGTGTTGAG-3'<br>5'-CTCAACTTAACTACCATCCGGACCAGAAGA-3'        | 6FAM: 6-carboxyfluorescein |
| 3-nt gap DNA | 5'-TCTTCTGGTCCGGATGGTAGTTAAGTGTTGAC-3'-6FAM<br>5'-GGACCAGAAGA-3'<br>5'-GTCAACTTAACTACCA-3' | 6FAM: 6-carboxyfluorescein |
